# Supplementary material for: Phosphorylated signal transducer and activator of transcription proteins 1 in salivary glandular tissue: an important histological marker for diagnosis of primary Sjögren’s syndrome
Source: HighWire-hosted journal article supplement (doi:10.1136/rmdopen-2022-002694), 2023-02-01
Supplement: rmdopen-2022-002694supp002_data_supplement.pdf [file rmdopen-2022-002694supp002_data_supplement.pdf]

**Supplementary table 1. Summary of transcriptome datasets of peripheral blood of patients with SjS**

| <b>GEO ID</b> | <b>Participants</b>                                                                                        | <b>Samples</b> | <b>Techniques</b> | <b>Platforms</b> | <b>Outcomes</b>      |
|---------------|------------------------------------------------------------------------------------------------------------|----------------|-------------------|------------------|----------------------|
| GSE48378      | 11 female SjS patients and age- and gender-matched 16 healthy controls                                     | PBMCs          | Array             | GPL5175          | Expression profiling |
| GSE51092      | 190 SjS patients and 32 controls                                                                           | Whole blood    | Array             | GPL6884          | Expression profiling |
| GSE66795      | 131 SjS patients and 29 age-matched non-SjS controls                                                       | Whole blood    | Array             | GPL10558         | Expression profiling |
| GSE84844      | 30 SjS patients (Mean age: 61.1 years; Male, 3.3%) and 30 healthy controls (Mean age:39.3 years; Male, 0%) | Whole blood    | Array             | GPL570           | Expression profiling |
| GSE145065     | 5 SjS patients and 5 age- and gender-matched healthy controls                                              | PBMCs          | RNA-seq           | GPL16791         | Expression profiling |

(PBMCs, peripheral blood mononuclear cells; RNA-seq, RNA-sequencing.)
