# Supplementary figures and images for: Phosphorylated signal transducer and activator of transcription proteins 1 in salivary glandular tissue: an important histological marker for diagnosis of primary Sjögren’s syndrome
Source: HighWire-hosted journal article supplement (doi:10.1136/rmdopen-2022-002694), 2023-02-01

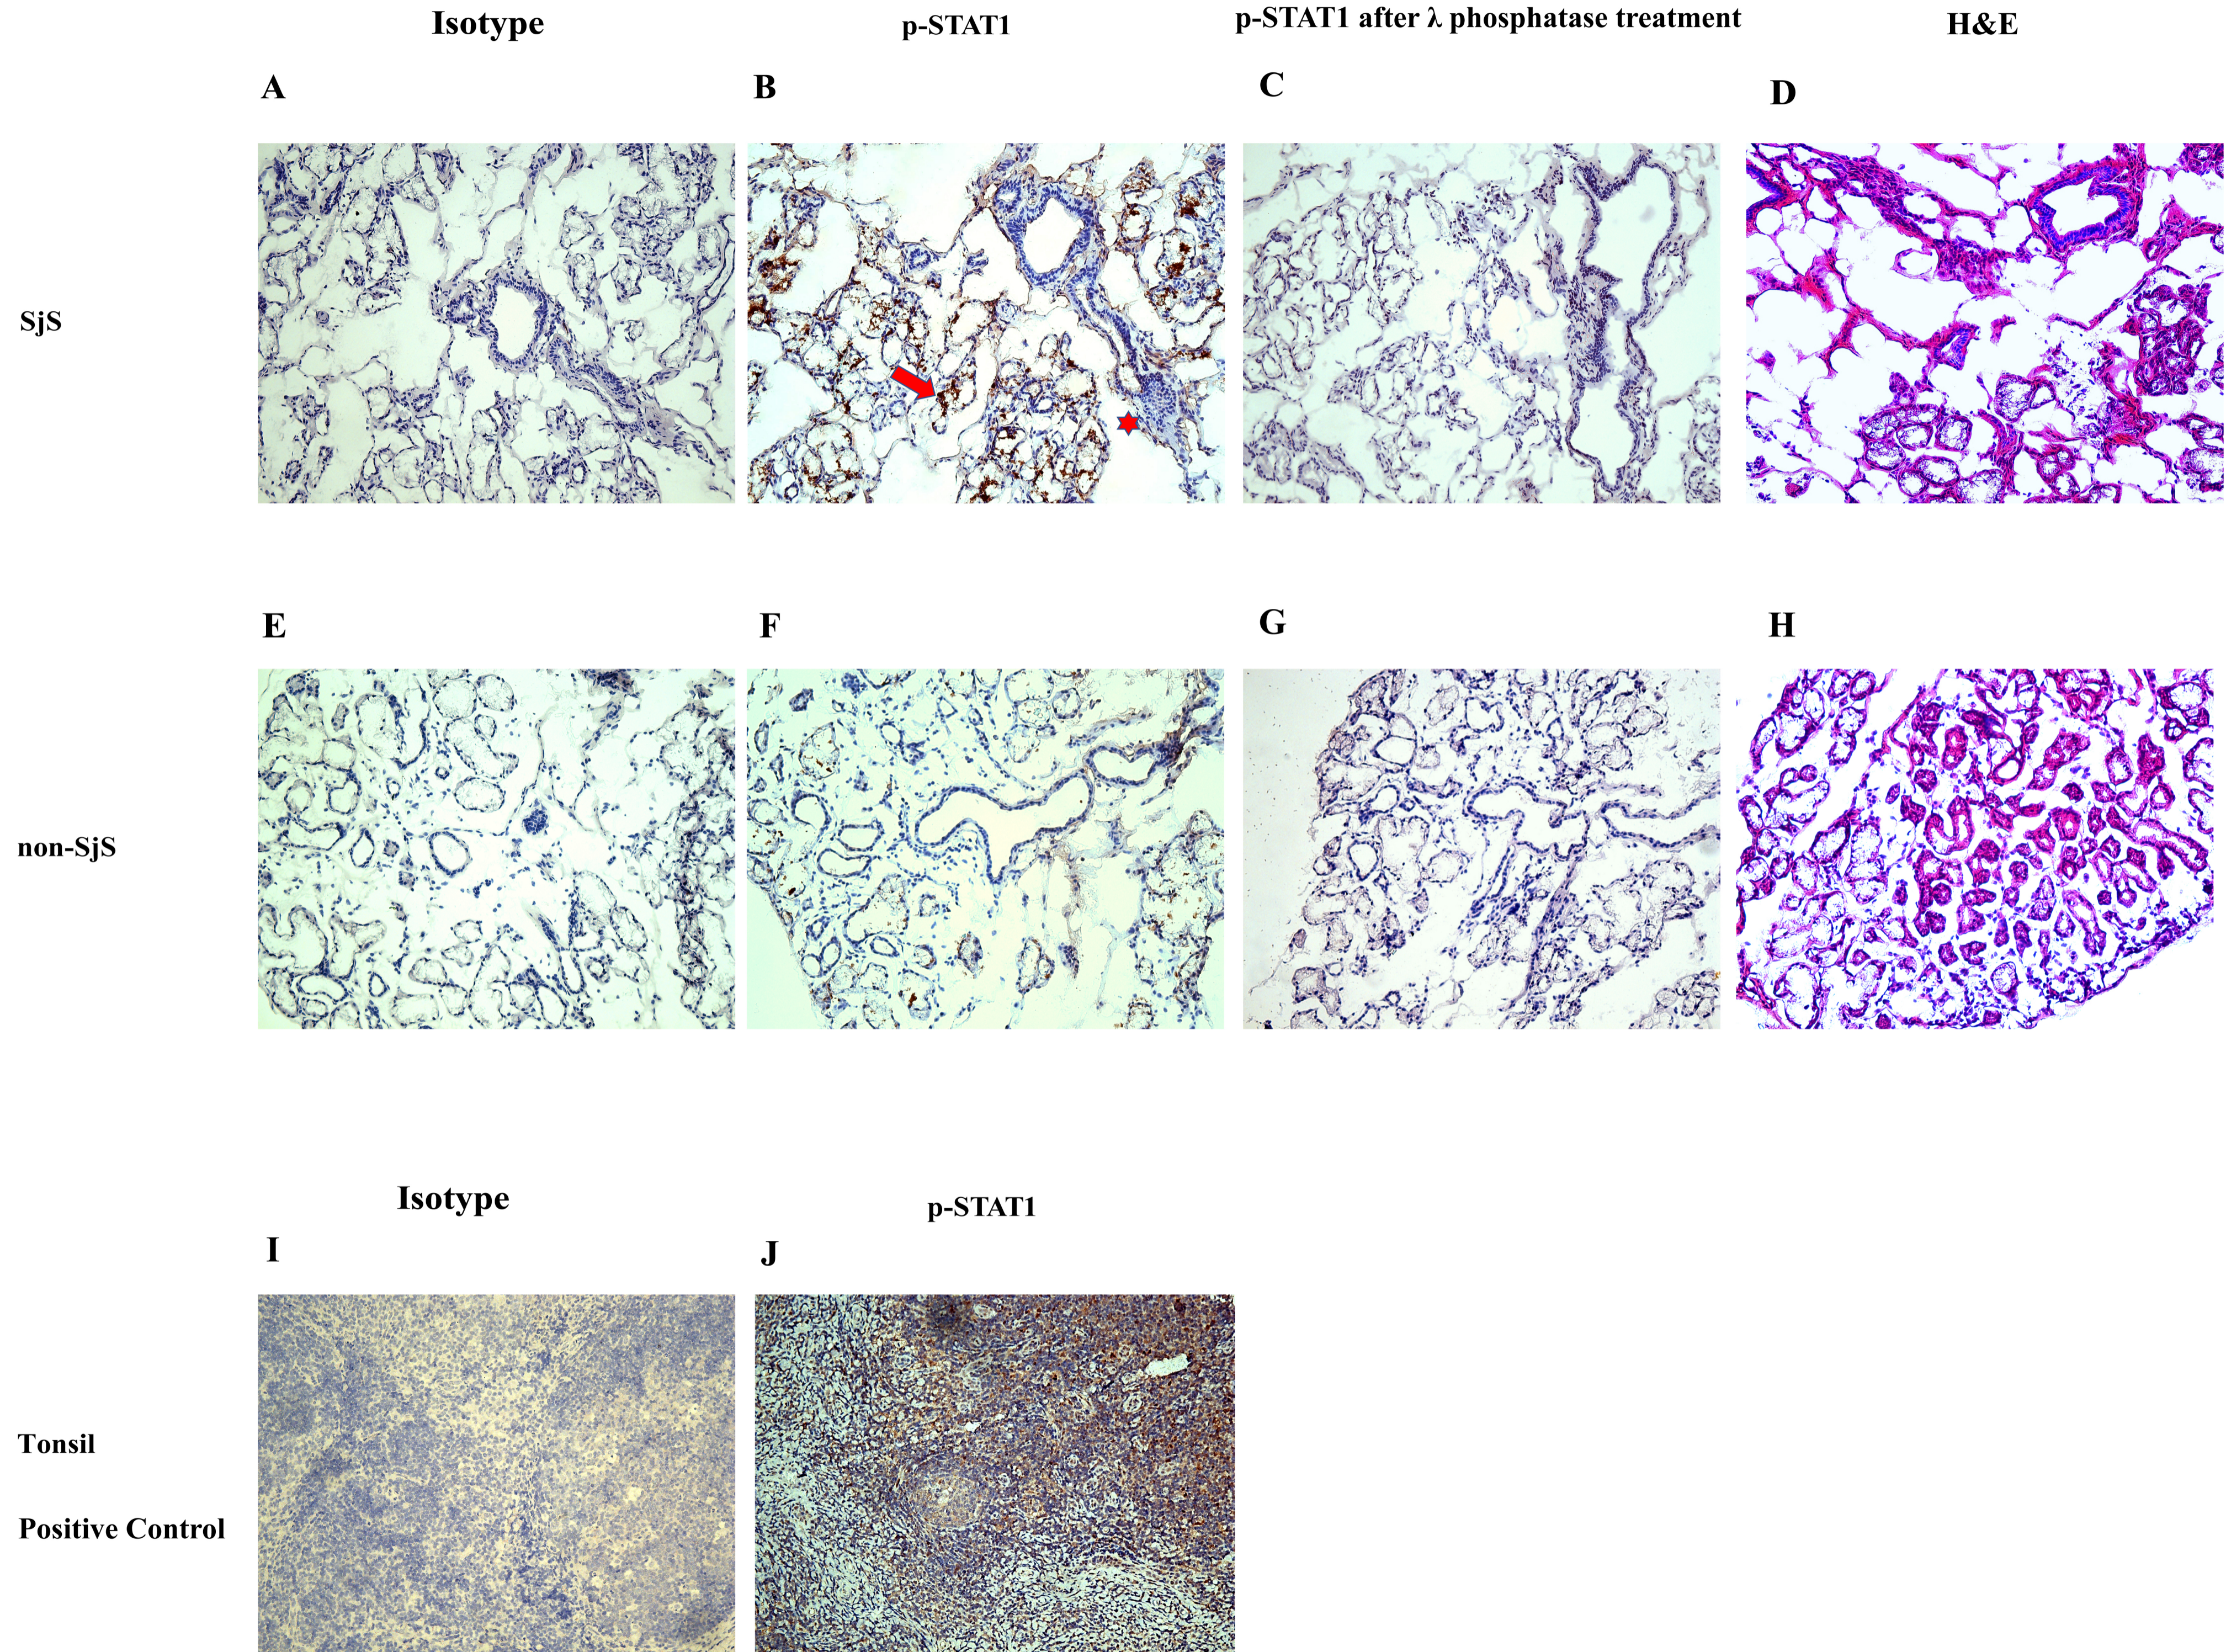

Supplement: rmdopen-2022-002694supp015_data_supplement.pdf [file rmdopen-2022-002694supp015_data_supplement.pdf]
